# Supplementary material for: A Nomogram for Preoperative Prediction of the Risk of Lymph Node Metastasis in Patients with Epithelial Ovarian Cancer
Source: MDPI journal article supplement (doi:10.3390/curroncol30030250), 2023-03-13
Supplement: s1 [file s1]

**Table S1.** CT scanners and parameters.

| CT scanners         | Aquilion IQon Spectral CT                 | Discovery 750 HD             | Somatom Force                              | uCT780                                     |
|---------------------|-------------------------------------------|------------------------------|--------------------------------------------|--------------------------------------------|
|                     | Philips Healthcare, Best, The Netherlands | GE Healthcare, Milwaukee, WI | Siemens Healthcare GmbH, Erlangen, Germany | United Imaging Healthcare, Shanghai, China |
| tube voltage (kVp)  | 120                                       | 120                          | 120                                        | 120                                        |
| tube current(mA)    | 252-426                                   | 171-348                      | 134-314                                    | 134-314                                    |
| slice thickness(mm) | 5                                         | 5                            | 5                                          | 5                                          |
| slice interval(mm)  | 5                                         | 5                            | 5                                          | 5                                          |
| Matrix              | 512*512                                   | 512*512                      | 512*512                                    | 512*512                                    |

Abbreviations: CT, computed tomography.
